# Supplementary material
Source: PubMed Central journal article supplement (PMC4157141)
Supplement: mmc1.pdf [file mmc1.pdf]

The American Journal of Human Genetics, Volume 95  
Supplemental Data

**A Mutation of *COX6A1* Causes  
a Recessive Axonal or Mixed Form  
of Charcot-Marie-Tooth Disease**

Gen Tamiya, Satoshi Makino, Makiko Hayashi, Akiko Abe, Chikahiko Numakura, Masao Ueki, Atsushi Tanaka, Chizuru Ito, Kiyotaka Toshimori, Nobuhiro Ogawa, Tomoya Terashima, Hiroshi Maegawa, Daijiro Yanagisawa, Ikuo Tooyama, Masayoshi Tada, Osamu Onodera, and Kiyoshi Hayasaka

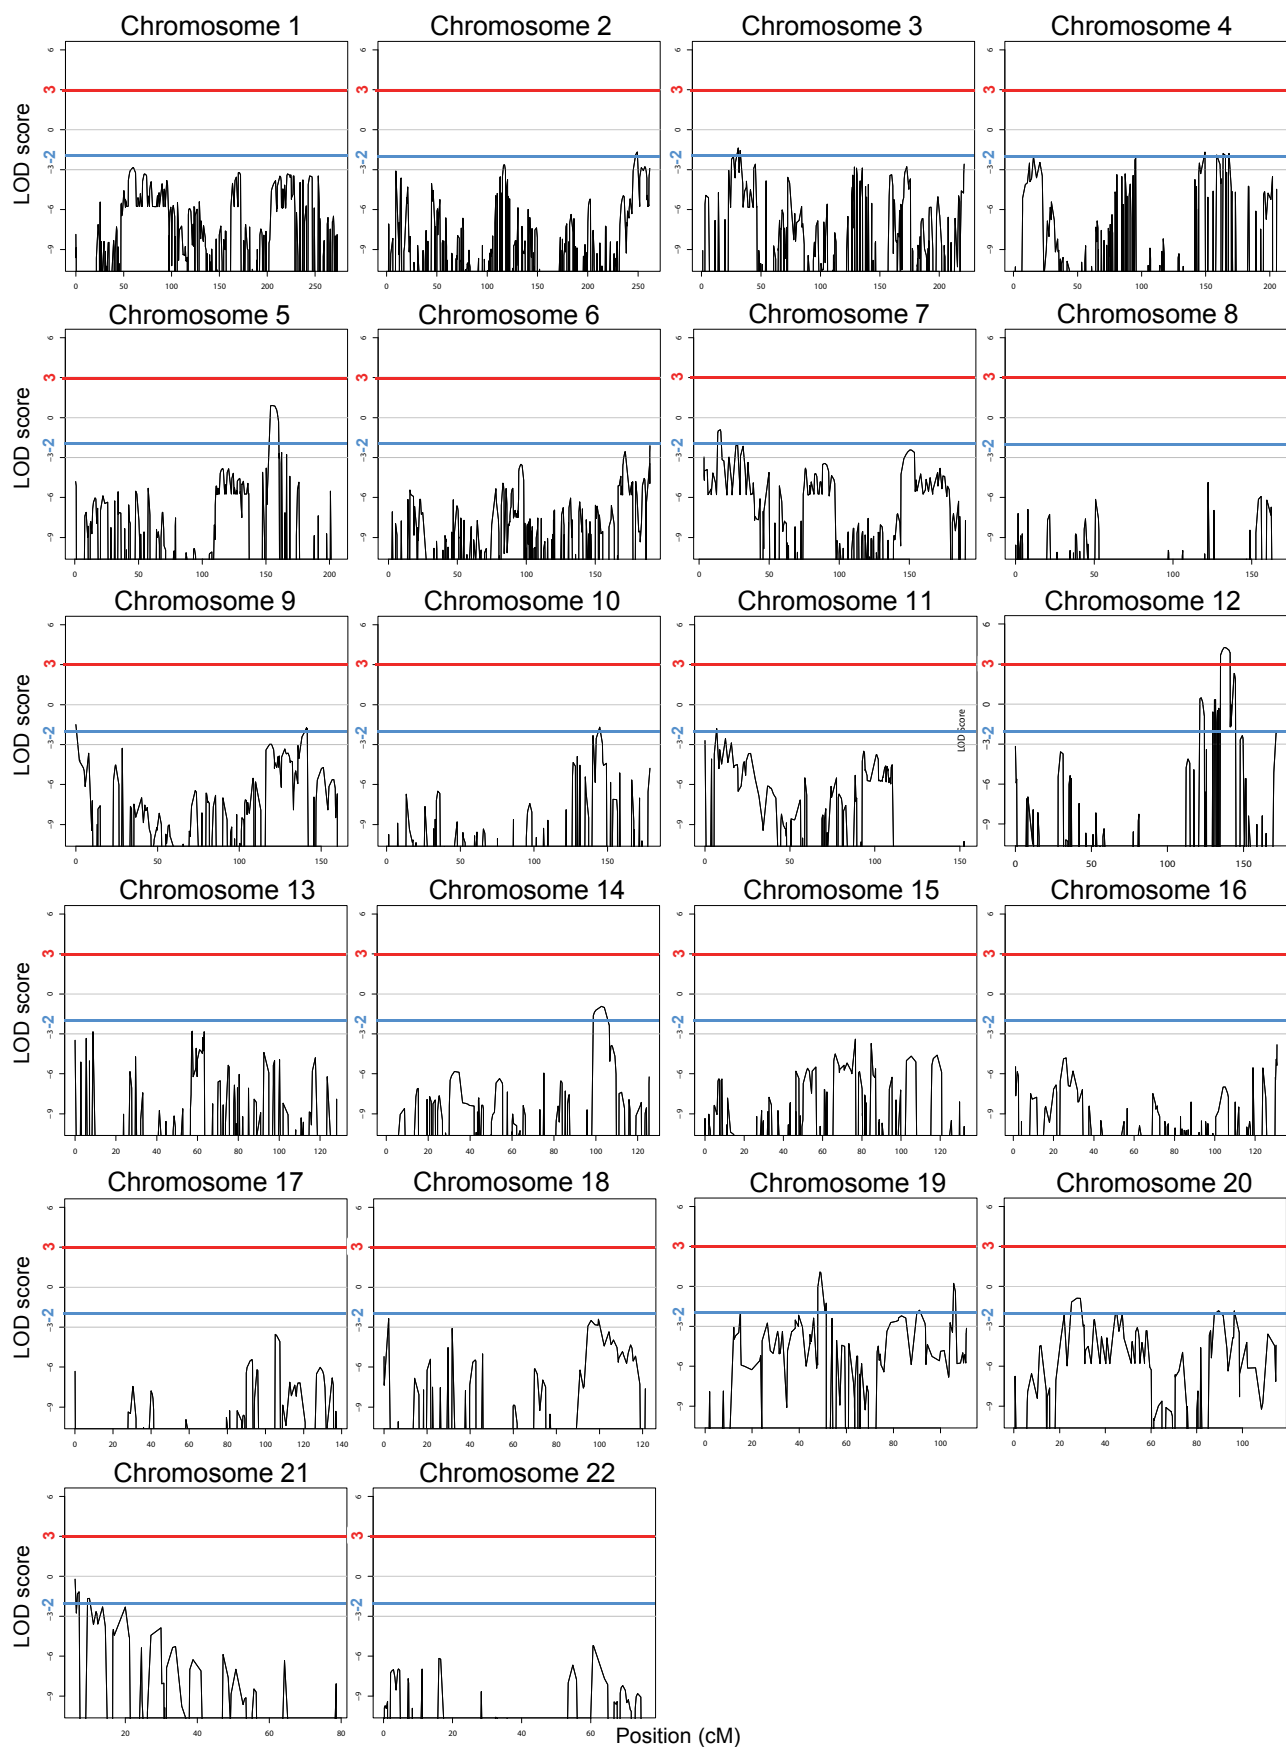

**Figure S1. Genome-wide plots of multipoint LOD-scores using the HumanLinkage V SNP panel.**

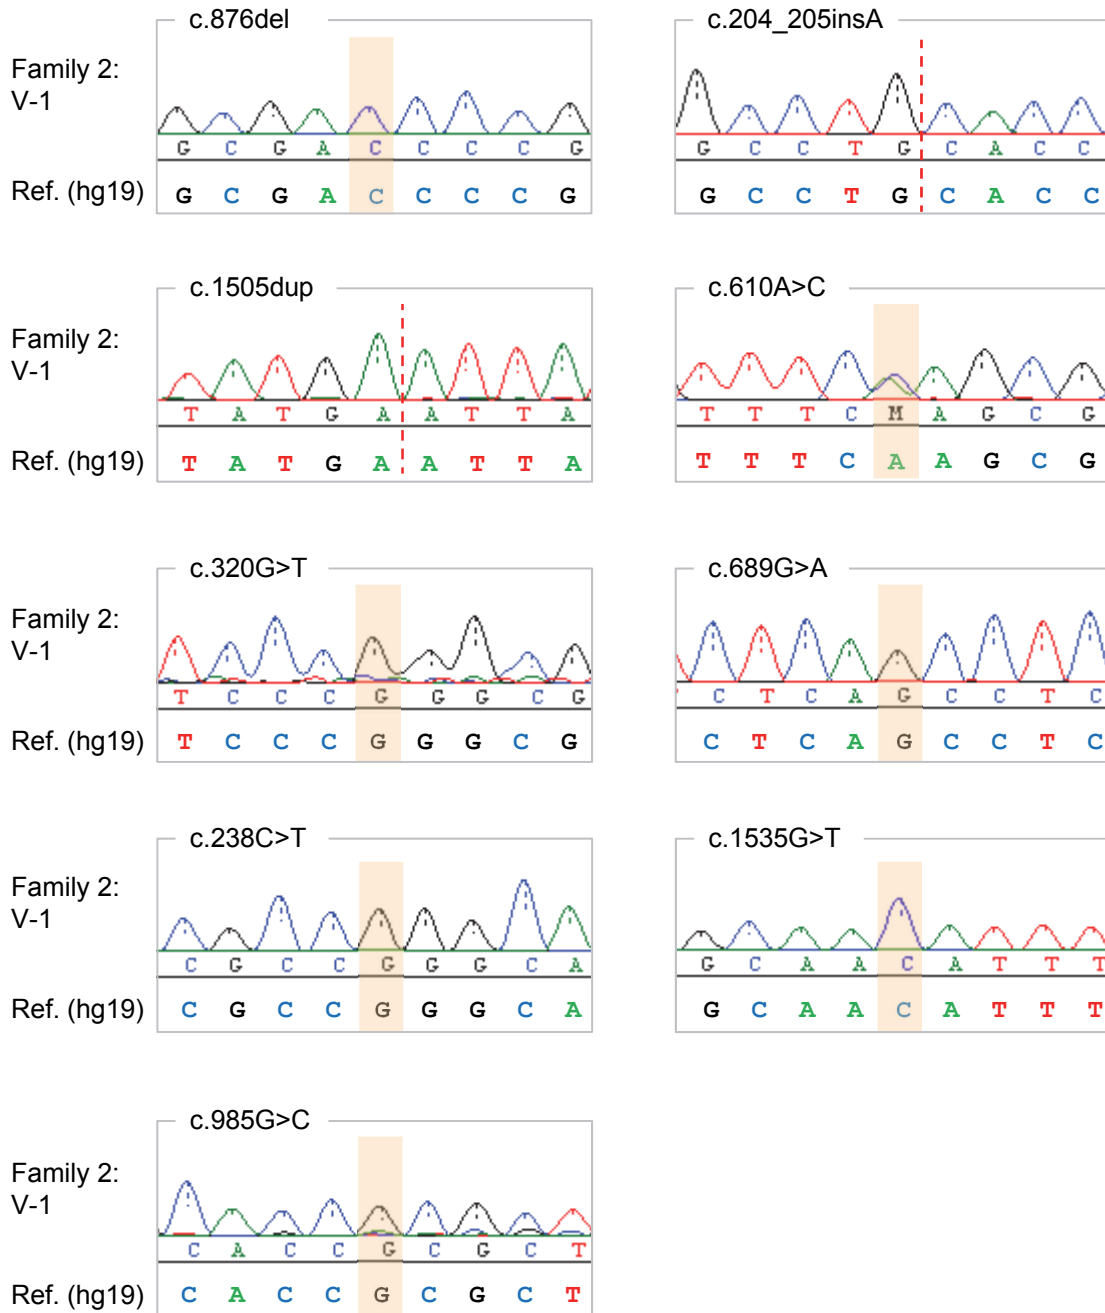

**Figure S2. Exclusion of survived variants by genotyping of the proband of family 2.**

In the proband of family 2, electropherograms of nine variants listed in Table S8 are shown. We successfully confirmed that these variants except for 5-bp deletion are not carried by the proband of family 2.

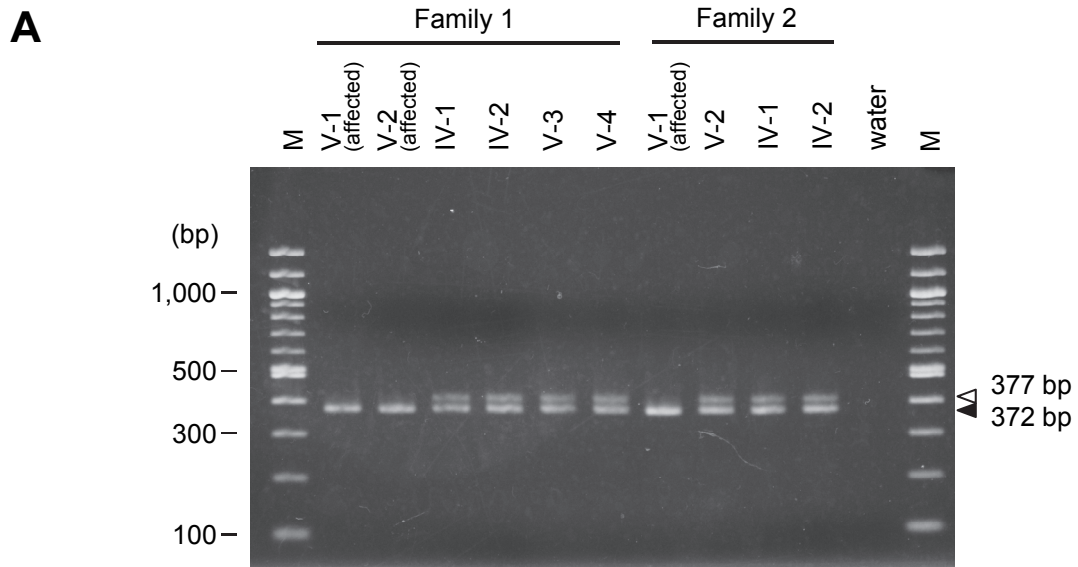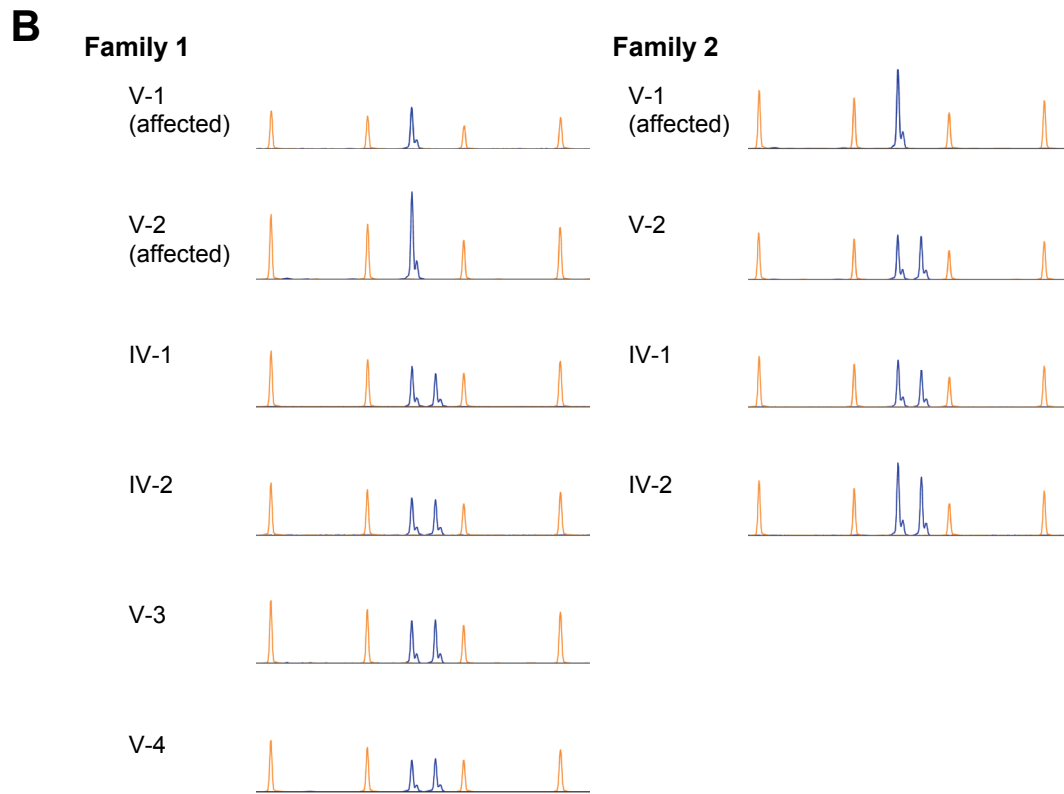

**Figure S3. Detection of the 5-bp deletion in *COX6A1*.**

The PCR fragments include the 5-bp deletion (372 bp) and wild-type (377 bp) were distinguishable by standard 1.5% agarose gel electrophoresis (A) or GeneScan analysis using 6-FAM labeled primer (B) (see also Figure 1E).

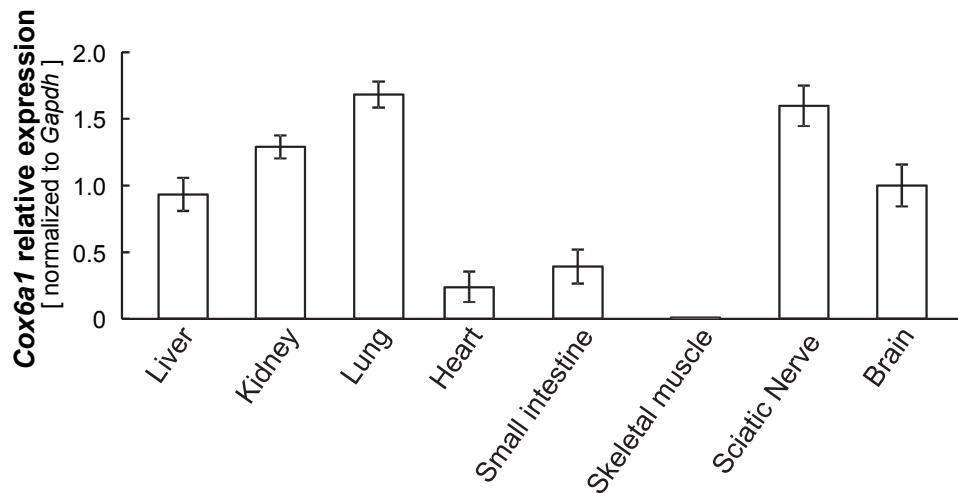

**Figure S4. *Cox6a1* expression in mouse tissues.**

*Cox6a1* expression levels in liver, kidney, lung, heart, small intestine, skeletal muscle, sciatic nerve and brain from three wild-type mice. The error bars represent the standard deviation. Total RNA was extracted using AllPrep DNA/RNA Kit (QIAGEN N.V., The Netherlands) according to the manufacturer's instructions with on-column DNase I treatment. After determining RNA concentrations using Quant-iT RiboGreen RNA Assay Kit (Life Technologies, USA), 50 ng of total RNA per 20  $\mu$ L reaction was used to synthesize cDNA using the High-Capacity cDNA Reverse Transcription Kit (Life Technologies, USA) with random primers. Relative quantification for *Cox6a1* was performed using a pre-developed TaqMan assay (Mm01612194\_m1; Life Technologies, USA). Real-time PCR was conducted using TaqMan Universal Master Mix II (Life Technologies, USA) with a 7500 Fast real-time PCR system (Life Technologies, USA). Each reaction was run in triplicate and contained 2  $\mu$ L of cDNA template in a final reaction volume of 20  $\mu$ L and data were analyzed following the Delta-Delta Ct method with 7500 Software v2.0.2. All samples were normalized to *Gapdh* as an endogenous control (4352662; Life Technologies, USA). The error bars represent the standard deviation.

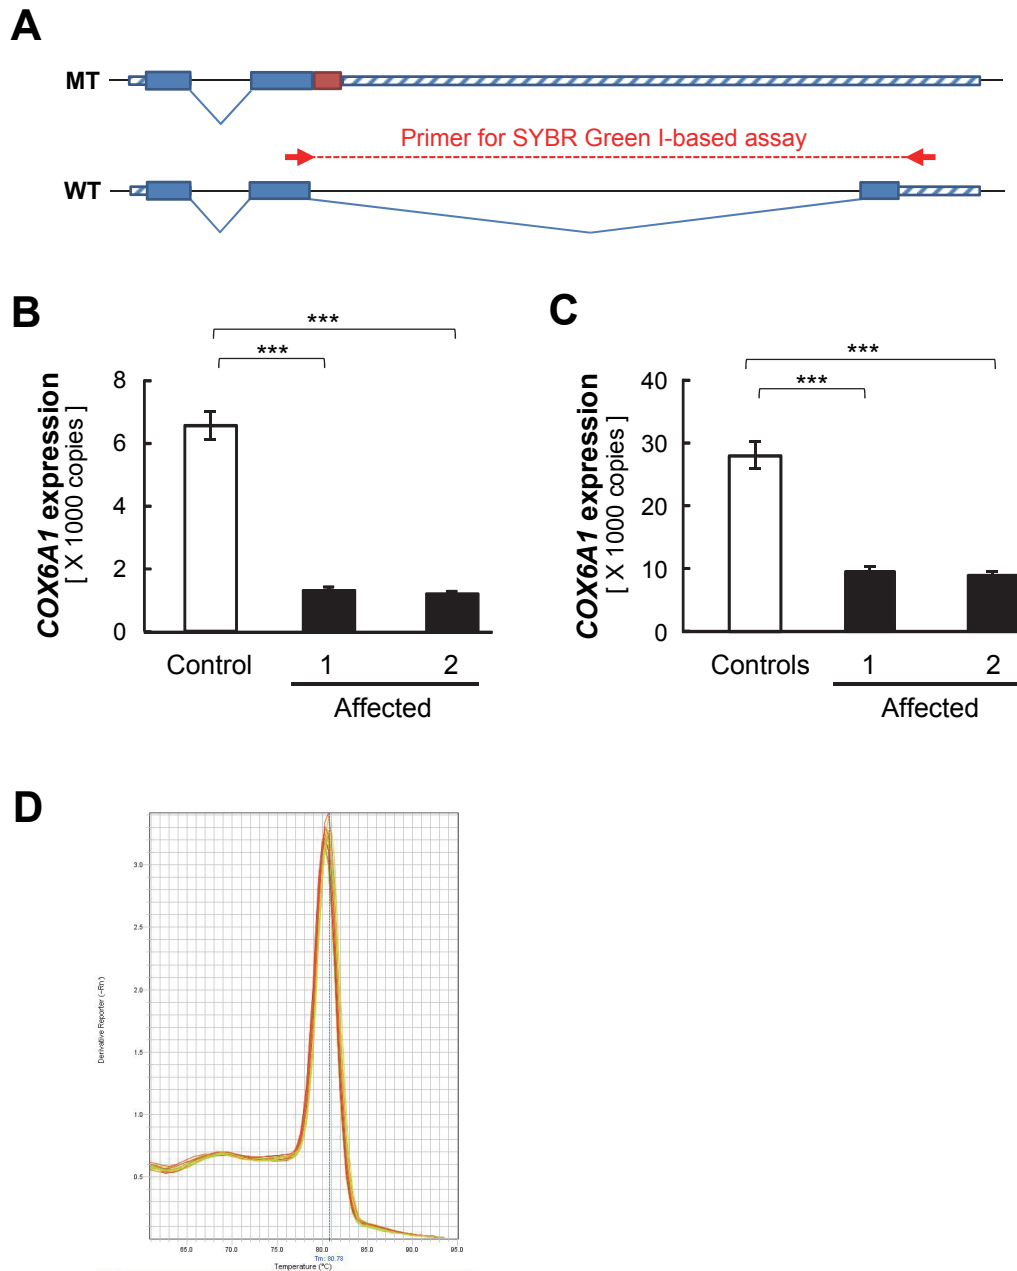

**Figure S5. *COX6A1* expression analysis using SYBR Green I-based assay.**

Primer position (A) and absolute quantification in peripheral white blood cells (B) and EBV transformed B cell lines (C) by real-time RT-PCR. The amplicon reveals a single peak in the melting curve (D). The error bars represent the standard deviation. Three asterisks (\*\*\*) indicates  $p < 0.001$ .

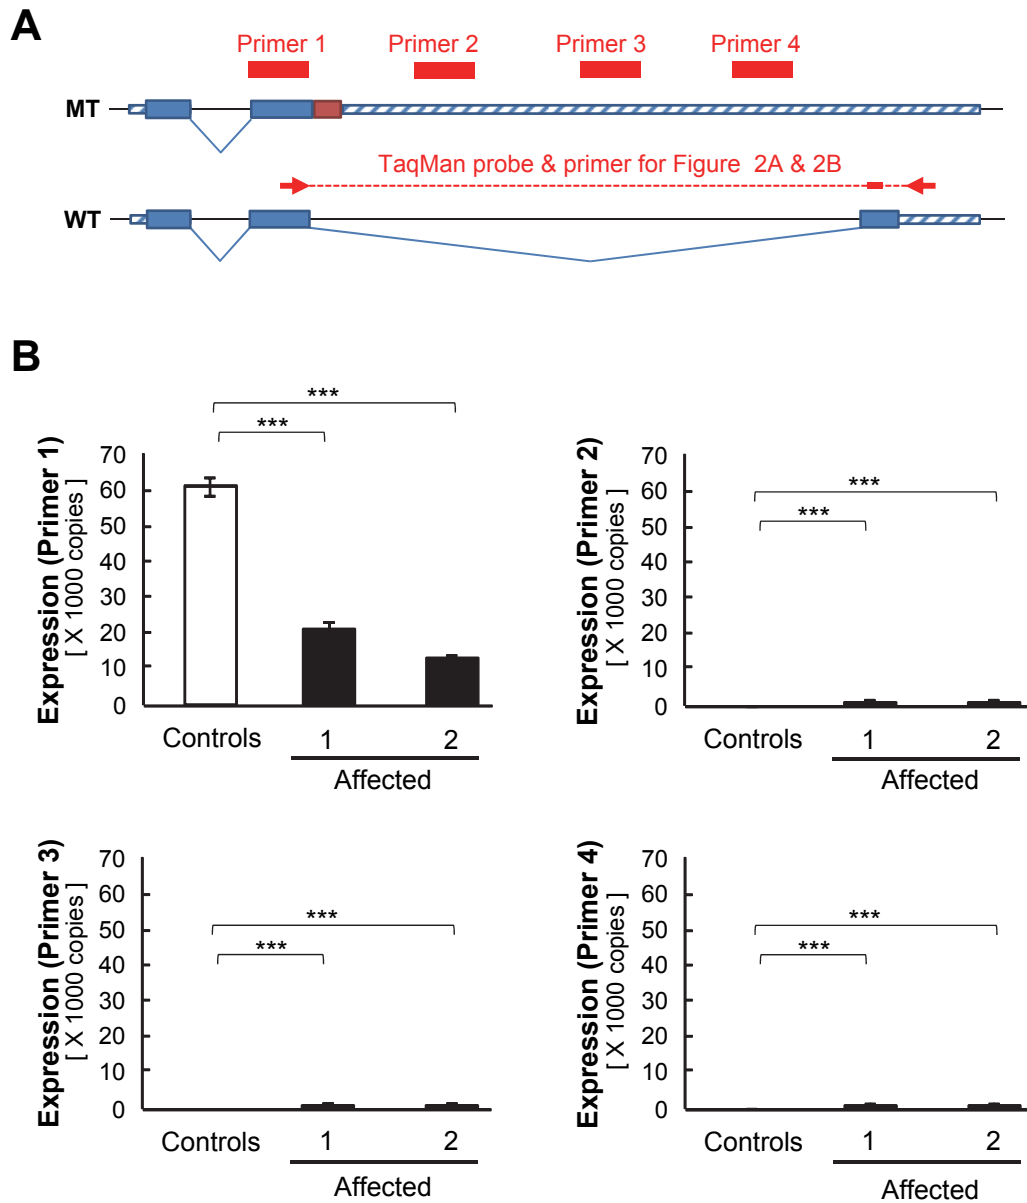

**Figure S6. *COX6A1* expression analysis in EBV transformed B cell lines.**

Primer position (A) and absolute quantification by real-time RT-PCR (B). To estimate the expression level of both wild-type and mutant-type *COX6A1* in details, the absolute quantification was performed using four primer sets (Table S12) with SYBR Green I fluorescent dye. The standard curves were obtained from PCR products in serial dilution. The error bars represent the standard deviation. Three asterisks (\*\*\*) indicates  $p < 0.001$ .

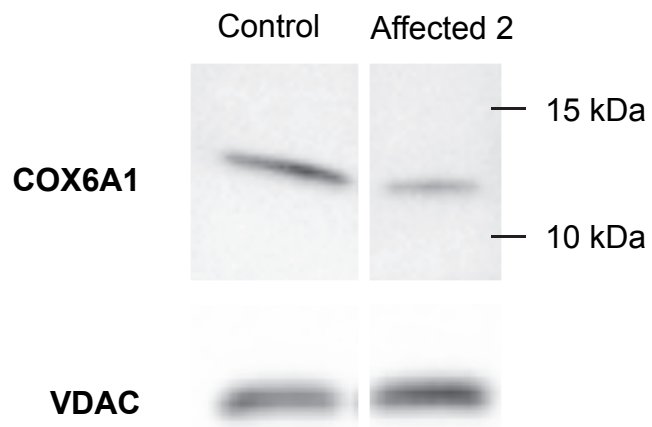

**Figure S7. Western blot of COX6A1 and VDAC as control for mitochondria fractions from EBV transformed B cell lines.**

The lanes run on different parts of the same blot. The primary antibody for COX6A1 (mouse monoclonal, ab110265; abcam, UK) is diluted 1:1,000. The following abbreviation is used: VDAC, voltage-dependent anion channel.



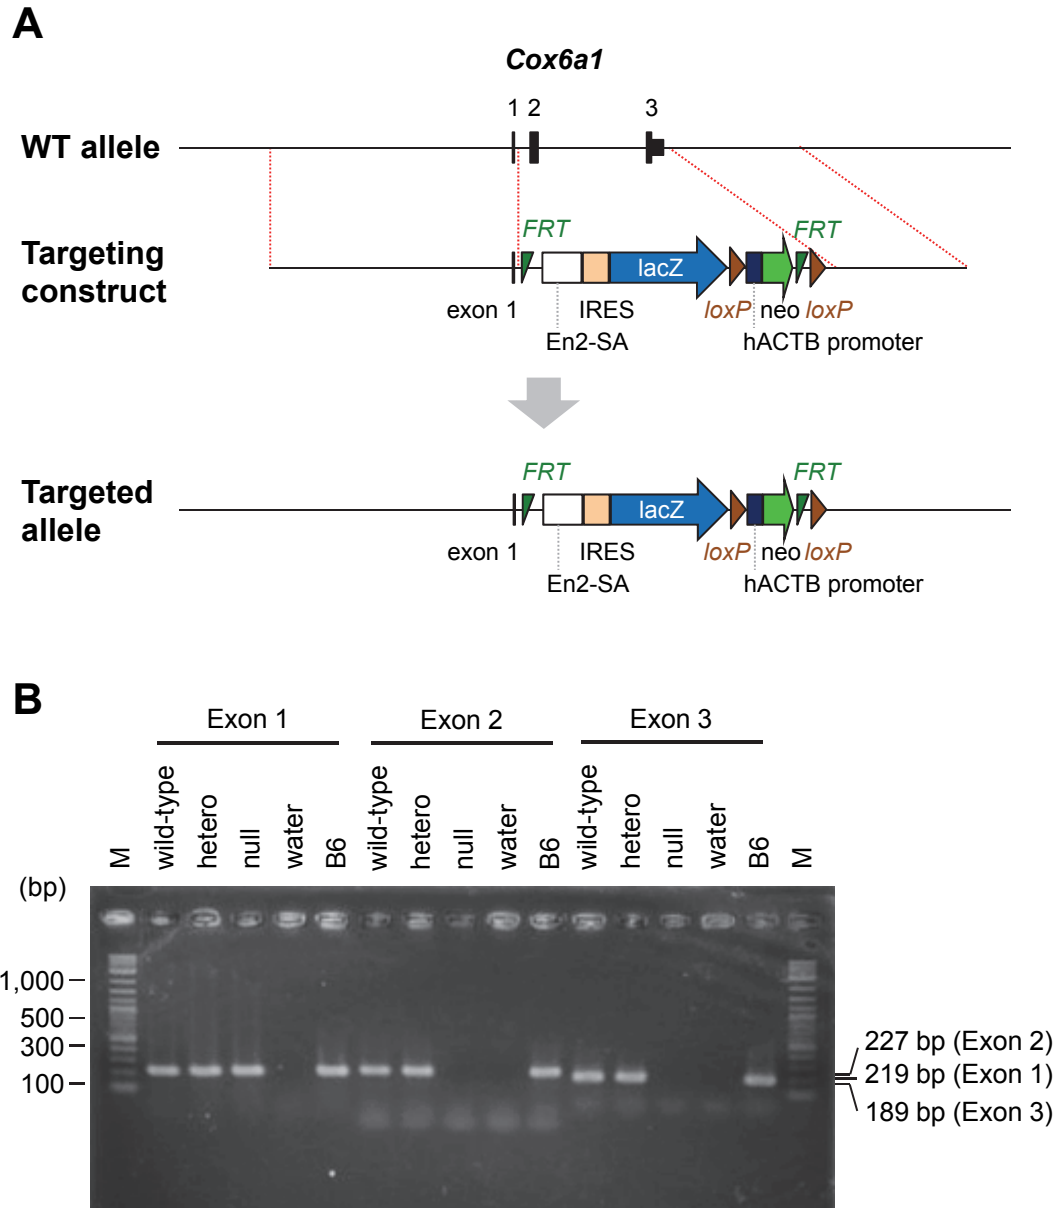

**Figure S8. *Cox6a1* knockout mouse.**

The knockout construct (A) and PCR genotyping result by agarose gel electrophoresis (B). The following abbreviation is used: B6, mouse background strain C57BL/6. Gene targeting was carried out as part of the International Knockout Mouse Consortium on a C57BL/6N genetic background (Project ID # CSD-74927) [1] and we obtained frozen sperm from Knockout Mouse Project (KOMP) repository, located at the University of California, Davis. Some female C57BL/6J mice (CLEA, Japan) were used as oocyte donors and in vitro fertilization was performed according to the consortium's instruction. To confirm targeted allele, exon-specific PCR were carried out using three different exon-specific primer sets (Table S13). We intercrossed the knockout heterozygous mice to produce homozygous (null) mice.

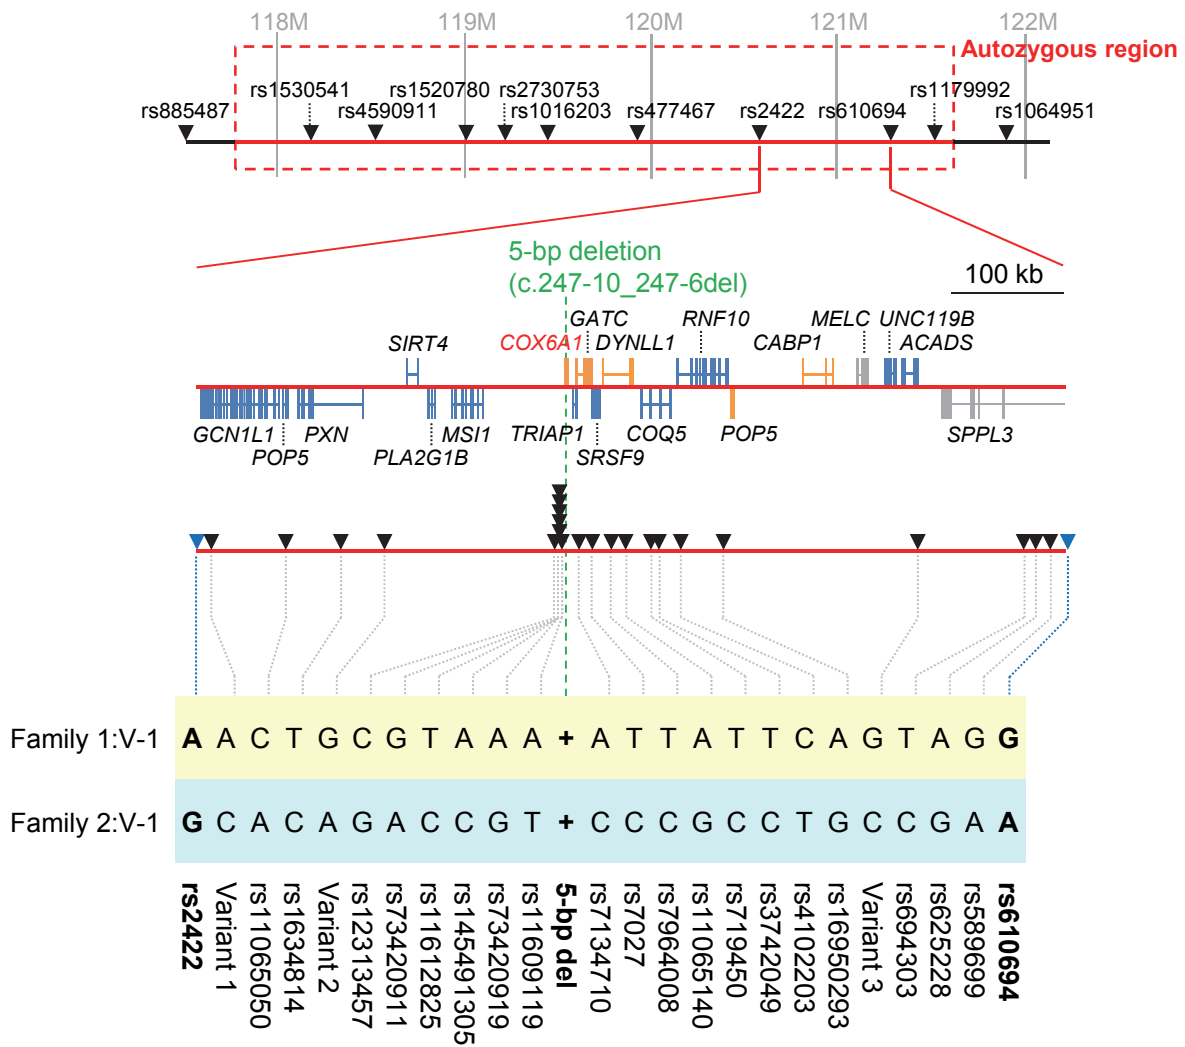

**Figure S9. Background haplotype within the interval including the 5-bp deletion.** In the 739 kb interval around the 5-bp deletion (between rs2422 and rs610694 from Illumina’s linkage panel), 22 SNVs were selected for additional genotyping (see also Table S14). Genotypes were obtained by PCR-direct Sanger sequencing. The PCR fragments were purified by ExoSAP-IT (Affymetrix, USA) and sequenced using the same primers as in the PCR process (Figure S10).

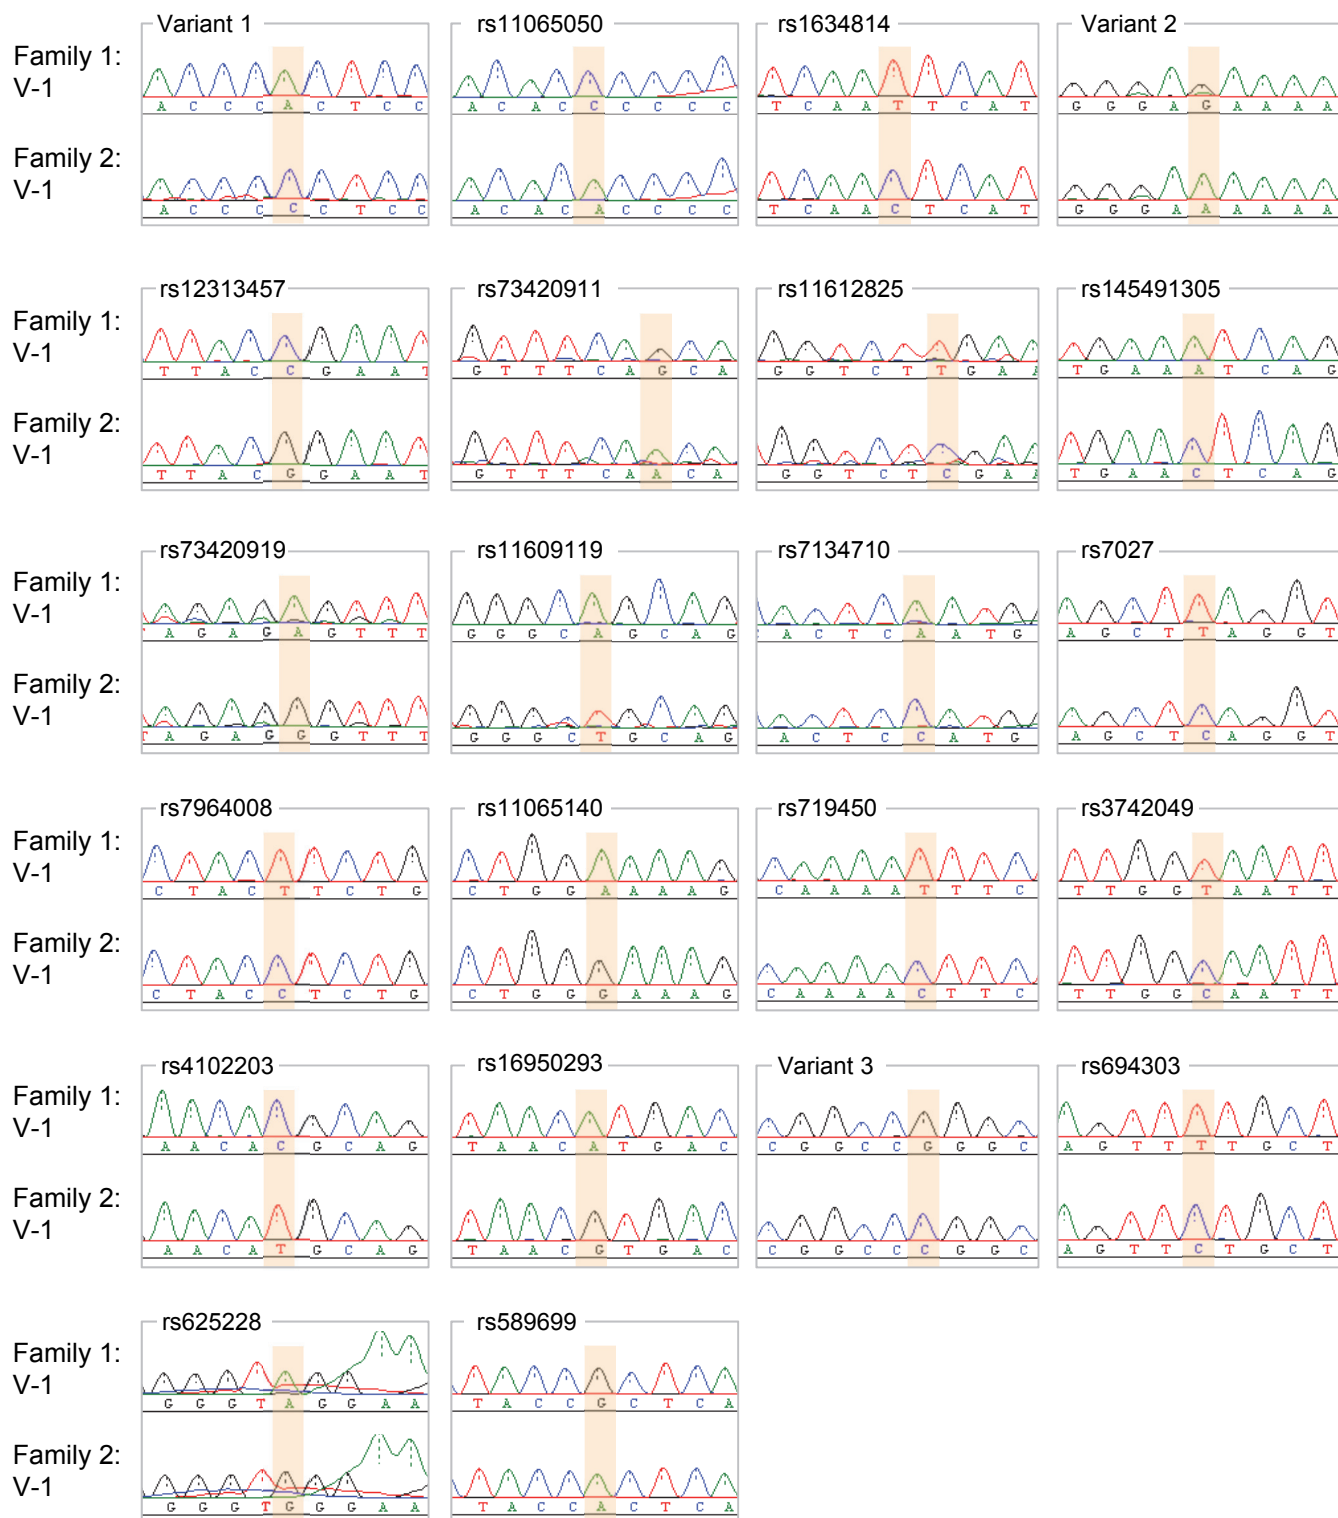

**Figure S10. Electropherograms of additionally genotyped single nucleotide variants around the 5-bp deletion.**

Around the 5-bp deletion (c.247-10\_247-6del), the electropherograms of Sanger-based PCR direct sequencing of 22 SNVs with homozygous alleles are shown.

**Table S1. Clinical course of the affected siblings of family 1**

| Individuals  | Parents                                      | Age               | Presentation                                                                               | Examinations                                                      |                                                                                                                  |                                                                                                              | Other Features                                                                                                                                                                                                                                                                                                                                                                                                       |
|--------------|----------------------------------------------|-------------------|--------------------------------------------------------------------------------------------|-------------------------------------------------------------------|------------------------------------------------------------------------------------------------------------------|--------------------------------------------------------------------------------------------------------------|----------------------------------------------------------------------------------------------------------------------------------------------------------------------------------------------------------------------------------------------------------------------------------------------------------------------------------------------------------------------------------------------------------------------|
|              |                                              |                   |                                                                                            | Name                                                              | Objects                                                                                                          | Results                                                                                                      |                                                                                                                                                                                                                                                                                                                                                                                                                      |
| Family 1 V-1 | Related but healthy parents (second cousins) | Early development | Normal                                                                                     |                                                                   |                                                                                                                  |                                                                                                              |                                                                                                                                                                                                                                                                                                                                                                                                                      |
|              |                                              | 4                 | Foot drop                                                                                  |                                                                   |                                                                                                                  |                                                                                                              |                                                                                                                                                                                                                                                                                                                                                                                                                      |
|              |                                              | 8                 |                                                                                            | Electrophysiological examination                                  | right median and ulnar nerves                                                                                    | motor NCV 43.4 m/s and 45.0 m/s undetectable sensory nerve action potentials                                 | Evoked action potentials were not detected in the study of motor and sensory tibial nerve.                                                                                                                                                                                                                                                                                                                           |
|              |                                              | 9                 |                                                                                            | Biopsy                                                            | sural nerve                                                                                                      | decreased myelinated fiber density, decrease of myelinated axon caliber and presence of onion bulb formation |                                                                                                                                                                                                                                                                                                                                                                                                                      |
|              |                                              |                   |                                                                                            | MRI                                                               | brain                                                                                                            | mild cerebral atrophy                                                                                        |                                                                                                                                                                                                                                                                                                                                                                                                                      |
|              |                                              | ~16               | slowly progressed in distal muscle weakness of upper and lower limbs and was wheel-chaired |                                                                   |                                                                                                                  |                                                                                                              |                                                                                                                                                                                                                                                                                                                                                                                                                      |
|              |                                              | 25                |                                                                                            | Clinical examination                                              |                                                                                                                  | distal muscle wasting of the legs, pes cavus, and clawing of the toes.                                       | Achilles tendon reflexes were absent. Vibration detection, touch and pinprick sensation was reduced in upper and lower distal limbs. He had no cerebral, cerebellar and pyramidal signs and symptoms. He did not have any signs or symptoms of liver and renal diseases with normal laboratory findings including serum albumin, transaminases, electrolytes, urea N and creatinine, and blood lactate and pyruvate. |
|              |                                              |                   |                                                                                            | Manual muscle strength testing                                    | deltoid and triceps brachii bilaterally                                                                          | grade 5                                                                                                      |                                                                                                                                                                                                                                                                                                                                                                                                                      |
|              |                                              |                   |                                                                                            |                                                                   | biceps brachii, and extensors and flexors of wrists bilaterally                                                  | grade 4                                                                                                      |                                                                                                                                                                                                                                                                                                                                                                                                                      |
|              |                                              |                   |                                                                                            |                                                                   | extensor muscles of fingers, iliopsoas, quadriceps femoris and hamstrings bilaterally                            | grade 2                                                                                                      |                                                                                                                                                                                                                                                                                                                                                                                                                      |
|              |                                              |                   | tibialis anterior, gastrocnemius, and extensors and flexors of toes bilaterally            | grade 0                                                           |                                                                                                                  |                                                                                                              |                                                                                                                                                                                                                                                                                                                                                                                                                      |
|              |                                              |                   | EMG                                                                                        |                                                                   | proximal and distal lower limb denervation with no evidence of myopathy                                          |                                                                                                              |                                                                                                                                                                                                                                                                                                                                                                                                                      |
|              |                                              |                   | Electrophysiological examination                                                           |                                                                   | delayed motor NCV (35.7 m/s) with low CMAP amplitude and undetectable sensory nerve action potentials (Table S2) |                                                                                                              |                                                                                                                                                                                                                                                                                                                                                                                                                      |
|              |                                              |                   | Biopsy                                                                                     | sural nerve                                                       | decreased myelinated fiber density, decrease of myelinated axon caliber and presence of onion bulb formation     |                                                                                                              |                                                                                                                                                                                                                                                                                                                                                                                                                      |
| V-2          | Related but healthy parents (second cousins) |                   |                                                                                            | similar clinical manifestation and laboratory findings (Table S2) |                                                                                                                  |                                                                                                              |                                                                                                                                                                                                                                                                                                                                                                                                                      |

**Table S2. Nerve conduction study of the affected siblings of family 1.**

| Nerve               | Motor        |             |               | F wave   |           | Sensory |          |                 |
|---------------------|--------------|-------------|---------------|----------|-----------|---------|----------|-----------------|
|                     | DL (ms)      | CV (m/s)    | CMAP (mV)     | Lat (ms) | Occur (%) | DL (ms) | CV (m/s) | SNAP ( $\mu$ V) |
| Affected member V-1 |              |             |               |          |           |         |          |                 |
| Rt median           | 7.6 (N<4.0)  | 35.7 (N>56) | 0.677 (N>3.5) | NE       |           |         |          | NE              |
| Rt ulnar            | 3.3 (N<3.2)  | 40.7 (N>50) | 1.3 (N>2.8)   | NE       |           |         |          | NE              |
| Rt posterior tibial |              |             |               | NE       |           |         |          | NE              |
| Rt Peroneal         |              |             |               | NE       |           |         |          | NE              |
| Affected member V-2 |              |             |               |          |           |         |          |                 |
| Rt median           | 8.7 (N<4.0)  | 34.8 (N>56) | 0.083 (N>3.5) | NE       |           |         |          | NE              |
| Rt ulnar            | 5.16 (N<3.2) | 37.3 (N>50) | 0.052 (N>2.8) | NE       |           |         |          | NE              |
| Rt posterior tibial |              |             |               | NE       |           |         |          | NE              |
| Rt Peroneal         |              |             |               | NE       |           |         |          | NE              |

DL: distal latency, CV: conduction velocity, CMAP: compound muscle action potential amplitude, Lat: latency, Occur: occurrence, SNAP: sensory nerve action potential amplitude, Rt: right, N: normal, NE: not evoked

**Table S3. Clinical course of the proband of family 2**

| Individual   | Parents         | Age                                                                                       | Presentation                   | Examinations                                                                           |                       |                                                         | Other Features                                                                                                                                                                                                                                                                             |
|--------------|-----------------|-------------------------------------------------------------------------------------------|--------------------------------|----------------------------------------------------------------------------------------|-----------------------|---------------------------------------------------------|--------------------------------------------------------------------------------------------------------------------------------------------------------------------------------------------------------------------------------------------------------------------------------------------|
|              |                 |                                                                                           |                                | Name                                                                                   | Objects               | Results                                                 |                                                                                                                                                                                                                                                                                            |
| Family 2 V-1 | Related parents | Early development                                                                         | Normal                         |                                                                                        |                       |                                                         |                                                                                                                                                                                                                                                                                            |
|              |                 | < 5                                                                                       | Unsteady gait                  |                                                                                        |                       |                                                         |                                                                                                                                                                                                                                                                                            |
|              |                 | 5                                                                                         |                                | Clinical examination                                                                   | upper and lower limbs | steppage gait, pes cavus, and decreased tendon reflexes | She was treated with short leg braces. She had a progression of distal muscle weakness of upper and lower limbs and deterioration of the ankle joint deformities.                                                                                                                          |
|              |                 |                                                                                           | Manual muscle strength testing | distal upper limb with lower limbs                                                     | mild decrease         |                                                         |                                                                                                                                                                                                                                                                                            |
|              |                 | 8                                                                                         |                                | Tendon achilles lengthening surgery                                                    |                       |                                                         |                                                                                                                                                                                                                                                                                            |
|              |                 | 9                                                                                         |                                | Posteromedial release and anterior tibial tendon transfer surgeries                    |                       |                                                         |                                                                                                                                                                                                                                                                                            |
|              |                 | 39                                                                                        | walked few steps with support  | Clinical examination                                                                   | legs                  | distal muscle wasting                                   | Deep tendon reflexes were absent in both extremities. Vibration detection, touch and pinprick sensation was reduced in upper and lower distal limbs. She had no cerebral, cerebellar and pyramidal signs and symptoms. She did not have any signs or symptoms of liver and renal diseases. |
|              |                 |                                                                                           |                                |                                                                                        | toes                  | clawing                                                 |                                                                                                                                                                                                                                                                                            |
|              |                 |                                                                                           | Manual muscle strength testing | deltoid, biceps brachii, triceps brachii, iliopsoas and quadriceps femoris bilaterally | grade 5               |                                                         |                                                                                                                                                                                                                                                                                            |
|              |                 |                                                                                           |                                | extensors and flexors of wrists, hamstrings and gluteus maximus bilaterally            | grade 3               |                                                         |                                                                                                                                                                                                                                                                                            |
|              |                 | extensors and flexors of muscles of fingers, bilaterally                                  | grade 2                        |                                                                                        |                       |                                                         |                                                                                                                                                                                                                                                                                            |
|              |                 | tibialis anterior, gastrocnemius, peroneus, and extensors and flexors of toes bilaterally | grade 0                        |                                                                                        |                       |                                                         |                                                                                                                                                                                                                                                                                            |
|              |                 | Electrophysiological examination                                                          | right and left median nerves   | mildly delayed motor NCV 45.3 and 49.6 m/s, respectively (Table S4)                    |                       |                                                         |                                                                                                                                                                                                                                                                                            |

**Table S4. Nerve conduction study of the proband of family 2.**

| Nerve               | Motor       |             |             |
|---------------------|-------------|-------------|-------------|
|                     | DL (ms)     | CV (m/s)    | CMAP (mV)   |
| Affected member V-1 |             |             |             |
| Rt median           | 3.7 (N<4.0) | 45.3 (N>56) | 5.0 (N>3.5) |
| Lt median           | 3.7         | 49.6        | 4.9         |
| Rt ulnar            | 3.3 (N<3.2) | 51.5 (N>50) | 4.3 (N>2.8) |
| Lt ulnar            | 3.5         | 41.8        | 0.8         |
| Rt tibial           |             |             | NE          |
| Lt tibial           |             |             | NE          |

DL: distal latency, CV: conduction velocity, CMAP: compound muscle action potential amplitude, Rt: right, Lt: left, N: normal, NE: not evoked

**Table S5. Summary of NGS performance.**

| Summary                             |               |
|-------------------------------------|---------------|
| Reads mapped to genome <sup>a</sup> | 1,024,056,995 |
| Data mapped to genome (Gb)          | 141.8         |
| Average sequenced depth (×)         | 49.6          |
| Genome covered (%)                  | 96.2          |

Gb: giga bases

<sup>a</sup>A total of 5 µg genomic DNA sample was subjected to enzymatic fragmentation using the NEB Next dsDNA Fragmentase kit (New England Biolabs, USA) according to the manufacturer's instructions. The resulting size distribution was between 500–700 bp (600 bp peak top) on the Agilent 2100 Bioanalyzer (Agilent Technologies, USA). Then, library preparation was performed using Paired-End DNA Sample Preparation Kit (Illumina, USA). After the check of size distribution and concentration by the Agilent Bioanalyzer 2100, total 5 times of cluster generation were performed from same library using a Paired-End Cluster Generation Kit (v4) on Cluster Station and four cBot Paired-End Cluster Generation Kit (v4) on cBot according to the manufacturer's instructions. 101 bp paired-end runs were performed, using TruSeq SBS kits (v5). Basecalling, mapping to a reference human genome (UCSC NCBI37/hg19) and variant detection were performed using the standard Illumina Pipeline (CASAVA 1.7).



**Table S6. Gap<sup>a</sup> filling by Sanger-based PCR direct sequencing.**

| Start     | End       | Length | Gene Symbols | Exon          | PCR Primers                     |                              |
|-----------|-----------|--------|--------------|---------------|---------------------------------|------------------------------|
|           |           |        |              |               | Forward                         | Reverse                      |
| 118498754 | 118498900 | 147    | WSB2         | exon 1 5' UTR | CCCGATCTTCCCGATCCTGTCTG         | GTACCGCCTCCCGATTTTCCATC      |
| 120907136 | 120907142 | 7      | SRSF9        | intron        | GAGGCGGACAAGGCTCATTTGGAC        | CATCCGCGAGATCGAGCTCAAGAAC    |
| 121078583 | 121078598 | 16     | CABP1        | exon 1 coding | GTAGAGGCTGCGCTGTCACATGG         | CGGCGGCTGGAACGGAGTC          |
| 121078674 | 121078697 | 24     | CABP1        | exon 1 coding | GTAGAGGCTGCGCTGTCACATGG         | CGGCGGCTGGAACGGAGTC          |
| 121078822 | 121078910 | 89     | CABP1        | exon 1 coding | GTAGAGGCTGCGCTGTCACATGG         | CGGCGGCTGGAACGGAGTC          |
| 121148179 | 121148186 | 8      | UNC119B      | exon 1 5' UTR | CCTCAGGTTGCTGATGGCAGCTCTAG      | CCACCAGAGCTACGTGAGCGTGG      |
| 121268251 | 121268289 | 39     | SPPL3        | intron        | GAGTAAATTTCACTGTTACGAACACTACACC | CTCCCCAACATATGCATGTACACC     |
| 121734510 | 121734607 | 98     | CAMKK2       | intron        | CTCCGGGCTTTGTGTGCCATG           | CCTCTTCGCTACTTTTCGTCTTTGCAGG |
| 121904681 | 121904758 | 78     | KDM2B        | intron        | GAGGGTCCTGGCACAACCTTTGCG        | GAGCGCCGAGGACGACGACTATG      |
| 121905015 | 121905015 | 1      | KDM2B        | exon 1 5' UTR | AGCGGCAGCAAACTTTCTCCTCAT        | CCTTCCTGGCTCGCCTCATGC        |
| 121905364 | 121905381 | 18     | KDM2B        | intron        | ATGCATATGCATGAGGCGAGCCAG        | GGAGACTGGGCTCTCAGAGCTTATCCAG |
| 121975839 | 121975878 | 40     | KDM2B        | intron        | TTTTCCCTCCAACCTTGCGTAACTCC      | G TTCAGTTTCAGCGCGGGCATG      |

<sup>a</sup>All gaps found on the linkage region were filled by Sanger-based PCR direct sequencing.

**Table S7. Summary of variants.**

| Variant categories <sup>a</sup> | counts    |
|---------------------------------|-----------|
| Total number of variants        | 3,716,455 |
| Frame-shift indel               | 154       |
| In-frame indel                  | 210       |
| Stop gain                       | 92        |
| Stop loss                       | 15        |
| Nonsynonymous                   | 10,556    |
| Splice site                     | 135       |
| 5-UTR                           | 27,123    |
| 3-UTR                           | 5,223     |
| Synonymous                      | 11,788    |
| Intron                          | 1,267,264 |
| Intergenic                      | 2,266,228 |
| ncRNA                           | 127,667   |
| Homozygous                      | 1,669,570 |
| Heterozygous                    | 2,046,885 |

<sup>a</sup>We applied ANNOVAR (version May 8, 2013) to appropriately annotate the genetic variants [2]. This included functional annotation by 'refGene' and 'knownGene' annotation databases, dbSNP (build 135 and 137) identifiers, and 1000 Genomes Project (Apr. 2012) allele frequencies. After the annotation process, functional (Frame-shift indel, In-frame indel, Stop-gain SNV, Stop-loss SNV, non-synonymous SNV, and Splice site variant), novel (Not reported in dbSNP 135 and 137) and homozygous variants were included for further analysis.

**Table S8. List of homozygous and potentially deleterious variants voted by at least one prediction methods.**

| Chr | Start     | Alleles   |         | Gene Symbols   | Types         | Accession      | Changes           |               | Functional Predictions |          |          |          | Mutation Taster <sup>a</sup> (probability) | Expression in nervous system |
|-----|-----------|-----------|---------|----------------|---------------|----------------|-------------------|---------------|------------------------|----------|----------|----------|--------------------------------------------|------------------------------|
|     |           | Reference | Variant |                |               |                | Nucleotide        | Protein       | PolyPhen-2 (HumVar)    | Grantham | PROVEAN  | SIFT     |                                            |                              |
| 12  | 120878247 | CACTC     | -       | <i>COX6A1</i>  | splicing      | NM_004373.3    | c.247-10_247-6del | NA            | splicing               | splicing | splicing | splicing | splicing                                   | +                            |
| 2   | 114257705 | C         | -       | <i>FOXD4L1</i> | frameshift    | NM_012184.4    | c.876del          | p.Gly293Alafs | indel                  | indel    | indel    | indel    | DC (1)                                     | -                            |
| 14  | 24470691  | -         | A       | <i>DHRS4L2</i> | frameshift    | NM_001193637.1 | c.204_205insA     | p.His69Thrfs  | indel                  | indel    | indel    | indel    | DC (1)                                     | -                            |
| 19  | 20807178  | -         | A       | <i>ZNF626</i>  | frameshift    | NM_001076675.2 | c.1505dup         | p.Ile503Hisfs | indel                  | indel    | indel    | indel    | DC (0.999)                                 | NA                           |
| 2   | 114257443 | A         | C       | <i>FOXD4L1</i> | nonsynonymous | NM_012184.4    | c.610A>C          | p.Lys204Gln   | 0.062                  | 53       | -3.933   | 0.021    | DC (0.999)                                 | -                            |
| 8   | 126443464 | G         | T       | <i>TRIB1</i>   | nonsynonymous | NM_025195.3    | c.320G>T          | p.Arg107Leu   | 0.392                  | 102      | -4.452   | 0.002    | DC (0.999)                                 | -                            |
| 2   | 73151606  | G         | A       | <i>EMX1</i>    | nonsynonymous | NM_004097.2    | c.689G>A          | p.Ser230Asn   | 0.023                  | 46       | -2.144   | 0.341    | DC (0.999)                                 | -                            |
| 2   | 97637964  | G         | A       | <i>FAM178B</i> | nonsynonymous | NM_001122646.2 | c.238C>T          | p.Arg80Trp    | NA                     | 101      | -3.127   | 0        | P (0.999)                                  | NA                           |
| 4   | 69403401  | C         | A       | <i>UGT2B17</i> | nonsynonymous | NM_001077.3    | c.1535G>T         | p.Cys512Phe   | NA                     | 205      | -7.344   | 0.107    | P (0.999)                                  | -                            |
| 9   | 133556937 | G         | C       | <i>PRDM12</i>  | nonsynonymous | NM_021619.2    | c.985G>C          | p.Ala329Pro   | 0.113                  | 27       | -0.66    | 0.041    | DC (0.973)                                 | +                            |

<sup>a</sup>Prediction by Mutation Taster: DC: Disease Causing; P: Polymorphism

**Table S9. Autozygosity in the linkage region on 12q24.**

|                    | Position    |             | bp        | Allelic state |              |
|--------------------|-------------|-------------|-----------|---------------|--------------|
|                    | start       | end         |           | homozygous    | heterozygous |
| 5' flanking region | 117,539,934 | 117,882,412 | 342,479   | 281           | 8            |
| Autozygous region  | 117,882,413 | 121,605,073 | 3,722,661 | 2,891         | 0            |
| 3' flanking region | 121,605,074 | 121,878,659 | 273,586   | 110           | 382          |

**Table S10. PCR primer sequences for validation of variants by Sanger-based PCR direct sequencing.**

| Chr | Start     | Alleles   |         | Gene Symbols | Accession      | Changes           |               | PCR Primers                   |                          | Related Figures and Tables |
|-----|-----------|-----------|---------|--------------|----------------|-------------------|---------------|-------------------------------|--------------------------|----------------------------|
|     |           | Reference | Variant |              |                | Nucleotide        | Protein       | Forward                       | Reverse                  |                            |
| 12  | 120878247 | CACTC     | -       | COX6A1       | NM_004373.3    | c.247-10_247-6del | NA            | TGGAATTAAACTGTCCTGTAGC        | GGTCCATGTGCAGAGTAAC      | Figures 2E & S3, Table S11 |
| 2   | 114257705 | C         | -       | FOXD4L1      | NM_012184.4    | c.876del          | p.Gly293Alafs | AAGACGAGGTGGAAGACGAG          | ATTGTCCGACAGGCTTGAC      | Figure S2                  |
| 14  | 24470691  | -         | A       | DHRS4L2      | NM_001193637.1 | c.204_205insA     | p.His69Thrfs  | GAGCACTGCCCTCTATGTCTAG        | GCACAATGTGCACATGTACC     | Figure S2                  |
| 19  | 20807178  | -         | A       | ZNF626       | NM_001076675.2 | c.1505dup         | p.Ile503Hisfs | TCATATCAATTCTTAGTTAGAAATTGAGG | AAGCCTTCAAGCGGTCTTC      | Figure S2                  |
| 2   | 114257443 | A         | C       | FOXD4L1      | NM_012184.4    | c.610A>C          | p.Lys204Gln   | AGACGAGGTGGAAGACGAG           | CGAGAGCAGTAGGTAGCGAG     | Figure S2                  |
| 8   | 126443464 | G         | T       | TRIB1        | NM_025195.3    | c.320G>T          | p.Arg107Leu   | AGACCAGTCTGCAAACCTCCA         | ATCTACTGATCCGCCCTGTG     | Figure S2                  |
| 2   | 73151606  | G         | A       | EMX1         | NM_004097.2    | c.689G>A          | p.Ser230Asn   | GCGTGTC AAGGAATGGAGAG         | CTTCCTCCAGGGAACCTG       | Figure S2                  |
| 2   | 97637964  | G         | A       | FAM178B      | NM_001122646.2 | c.238C>T          | p.Arg80Trp    | GATGGGTAGCCAAGGAGAAG          | GTTCTCTACCCATTTGCTG      | Figure S2                  |
| 4   | 69403401  | C         | A       | UGT2B17      | NM_001077.3    | c.1535G>T         | p.Cys512Phe   | GCTCAGTAACTTTTGTGTGGG         | CTGGATCGAGCAGTCTTCTG     | Figure S2                  |
| 9   | 133556937 | G         | C       | PRDM12       | NM_021619.2    | c.985G>C          | p.Ala329Pro   | CTACAAGTGCCAGGTGTGCCAGAG      | CTCTACAGCAGCAGGGAGACTCGG | Figure S2                  |

**Table S11. Screening of 5-bp deletion in COX6A1 among diverse ethnic populations.**

| Populations      | Number of individuals <sup>a</sup> | PCR product size <sup>b</sup> |                           |
|------------------|------------------------------------|-------------------------------|---------------------------|
|                  |                                    | 377 bp<br>(wild type)         | 372 bp<br>(5-bp deletion) |
| Caucasian        | 100                                | 100                           | 0                         |
| African American | 100                                | 100                           | 0                         |
| Amerindian       | 9                                  | 9                             | 0                         |
| Cambodian        | 1                                  | 1                             | 0                         |
| Druze            | 1                                  | 1                             | 0                         |
| Melanesian       | 2                                  | 2                             | 0                         |
| Pygmy            | 5                                  | 5                             | 0                         |
| Japanese         | 508                                | 508                           | 0                         |
| Total            | 726                                | 726                           | 0                         |

<sup>a</sup>Genomic DNAs of 218 unrelated individuals from diverse ethnic populations were provided by Coriell Cell Repositories. In addition, genomic DNAs of 508 unrelated Japanese individuals were obtained [3].

<sup>b</sup>After amplification (see also Table S10) by standard PCR in 50  $\mu$ L reaction volume containing 4 ng of genomic DNA, the PCR fragments include the 5-bp deletion (372 bp) or wild-type (377 bp) were produced. They are distinguishable by standard 1.5% agarose gel electrophoresis.

**Table S12. Sequences of PCR primers and TaqMan probe used in the expression analysis of COX6A1.**

| Assay type   | Target Molecule | Assay Name | PCR Primers               |                           | TaqMan Probe        | Related Figures |
|--------------|-----------------|------------|---------------------------|---------------------------|---------------------|-----------------|
|              |                 |            | Forward                   | Reverse                   |                     |                 |
| TaqMan       | Wild-type       | -          | CACGAGAGACCCGAGTTCATC     | TTTCTGGTCCATGTGCAGAGTAAC  | (MGB)ACCAAGCCGTTTCC | 2A, 2B          |
| SYBR Green I | Wild-type       | -          | CATCAGGACCAAGCCGTTTC      | TTTCTGGTCCATGTGCAGAGTAAC  | -                   | S5              |
| SYBR Green I | both            | Primer 1   | GGCGGTAGTTGGTGTGTCCTC     | CTTGGTCCTGATGCGGAGATG     | -                   | S6              |
| SYBR Green I | Mutant-type     | Primer 2   | TTCTCTTTTCGTTATGTGTGCCTTA | GCAGGAGGTAGGATGAATCGG     | -                   | S6              |
| SYBR Green I | Mutant-type     | Primer 3   | GTGAGCCAAGATCCAGCCAT      | TGCCGCTCAAAGACTCAACA      | -                   | S6              |
| SYBR Green I | Mutant-type     | Primer 4   | TTGTTTGAAGTCTGGGATGGTG    | CTGGCTACAGGACAGTTTTAATTCC | -                   | S6              |

**Table S13. PCR primer sequences for genotyping of *Cox6a1* null mice.**

| Target | PCR Primers          |                       | Amplicon size (bp) |
|--------|----------------------|-----------------------|--------------------|
|        | Forward              | Reverse               |                    |
| exon 1 | CTAGGCGCTGACAAGCAG   | CGCCATCATGGA ACTACAC  | 219                |
| exon 2 | GTGAGCATGCTCAACGTG   | CTATCTGCACGGACGGAC    | 227                |
| exon 3 | CCATCCCTTCTGCTTGTAAG | TGCTAAGCACAAAGAAACCAG | 189                |



**Table S14. Additionally genotyped single nucleotide variants around the 5-bp deletion.**

| Variants        | Positions        | Distance from<br>5-bp del (kb) | PCR Primers               |                            | Criteria <sup>a</sup> | dbSNP<br>MAF | Genotypes |          |
|-----------------|------------------|--------------------------------|---------------------------|----------------------------|-----------------------|--------------|-----------|----------|
|                 |                  |                                | Forward                   | Reverse                    |                       |              | 1:V-1     | 2:V-1    |
| <b>rs2422</b>   | <b>120565188</b> | <b>-313.1</b>                  | -                         | -                          | <b>ILP</b>            | <b>0.495</b> | <b>A</b>  | <b>G</b> |
| Variant 1       | 120578265        | -300.0                         | CTAGGAATTCAGACAAGGATGC    | TTGCAGGCTAAGAGCTAAGTG      | NGS                   | -            | A         | C        |
| rs11065050      | 120641900        | -236.3                         | GGATGGAAAATAACATGAATGAG   | TGTCTTGGTTTTAAACCTGCTAC    | HM3,MAF               | 0.184        | C         | A        |
| rs1634814       | 120685747        | -192.5                         | CTGCAGATGTTTCAAGCAAC      | CCTGCTCTTCACCTCTCTTG       | HM3                   | 0.371        | T         | C        |
| Variant 2       | 120724972        | -153.3                         | TGGTAGTGGGTCTCATCTTTG     | TACTACAAGGGCTATCTCAGCAG    | NGS                   | -            | G         | A        |
| rs12313457      | 120869349        | -8.9                           | AATTTCTTTACAGCAATGCAAG    | AAGGTGGTATATTGGAATGTATTG   | 1KGP,MAF              | 0.128        | C         | G        |
| rs73420911      | 120872479        | -5.8                           | CTGGTGGTATCTTTTGGAAAG     | TGTTAGAATTGTCTTGATCTAGTCC  | 1KGP,MAF              | 0.128        | G         | A        |
| rs11612825      | 120874200        | -4.0                           | CTTCATGAAACTGCATGACC      | TATGCCTCAGATCAAGAGCTC      | 1KGP,MAF              | 0.127        | T         | C        |
| rs145491305     | 120874512        | -3.7                           | ATGGGAGTTCAACTCTTGTTG     | TTCTCTAAAGACACACCTATGTG    | 1KGP,MAF              | 0.128        | A         | C        |
| rs73420919      | 120874620        | -3.6                           | ATGGTGCAATCTCAGCTCAC      | CCCTTTGAGAATGTAATGAGGAC    | 1KGP,MAF              | 0.130        | A         | G        |
| rs11609119      | 120877821        | -0.4                           | CATCACCTAGCCCATATAGGAC    | CAAGCTCAAGTTAGTTACTCATCATC | 1KGP,MAF              | 0.144        | A         | T        |
| <b>5-bp del</b> | <b>120878247</b> | <b>0.0</b>                     | -                         | -                          | <b>NGS</b>            | -            | <b>+</b>  | <b>+</b> |
| rs7134710       | 120888510        | 10.3                           | TGACTGTAGATTTGTGAAAGTGG   | GTCAGGGCTTTTTATAGCTAAGATG  | 1KGP,MAF              | 0.149        | A         | C        |
| rs7027          | 120901266        | 23.0                           | CTGCTTTCCTACAAGGAAAGAC    | CTAGTGCAGTCGGTCTTCATAC     | HM3,MAF               | 0.177        | T         | C        |
| rs7964008       | 120918397        | 40.2                           | ACCTCAATCTGCATCCAGAG      | TGGAACAAAAGGCATAATGG       | HM3,MAF               | 0.150        | T         | C        |
| rs11065140      | 120929541        | 51.3                           | GGGGTCTTCAATCAACTCTG      | AATGTCGCTGGAGACACTAAG      | HM3,MAF               | 0.159        | A         | G        |
| rs719450        | 120954033        | 75.8                           | CTTTACAGGAGATGAGAGGTCC    | AGACACAGGGGAAGTATTTGTATC   | HM3,MAF               | 0.207        | T         | C        |
| rs3742049       | 120954490        | 76.2                           | TTCAACCTGCCATCTATAAG      | ATCCAGTTAGCTAACACAGGTACTC  | HM3,MAF               | 0.146        | T         | C        |
| rs4102203       | 120976371        | 98.1                           | GCCATTTGCTTCCTAGCTAC      | TACCAGAATAACAGGAAGAATGC    | HM3,MAF               | 0.074        | C         | T        |
| rs16950293      | 121015461        | 137.2                          | GGAAAGCTGTAACTCACGAAG     | TAACAGAAACACTGGTGATTCTG    | HM3,MAF               | 0.158        | A         | G        |
| Variant 3       | 121177337        | 299.1                          | CATGGGCTACGTGACAGAG       | ACCTCAAGGAAAAGACAGACC      | NGS                   | -            | G         | C        |
| rs694303        | 121268624        | 390.4                          | GGTGAGGAATTCAGTTCTAAGC    | GACCGAAGTTGAATGTTTCAC      | HM3,MAF               | 0.201        | T         | C        |
| rs625228        | 121278266        | 400.0                          | TTTGGGCCATAAAAAGGAG       | CATCTGGCCACAATTCTG         | HM3                   | 0.469        | A         | G        |
| rs589699        | 121288685        | 410.4                          | TCCCTTTTTAAATGTGAGTAACAT( | ATTCATTAGGAATGATAACACCTG   | HM3,MAF               | 0.204        | G         | A        |
| <b>rs610694</b> | <b>121304826</b> | <b>426.6</b>                   | -                         | -                          | <b>ILP</b>            | <b>0.494</b> | <b>G</b>  | <b>A</b> |

<sup>a</sup>Variants that satisfy the following criteria were selected for the additional genotyping.

ILP: SNP markers nearest the 5-bp deletion in Illumina's Linkage Panel.

NGS: Single nucleotide variants newly found by our Next Generation Sequencing analysis.

HM3: SNP markers tagging each haplotype in probands of family 1 and 2 from HapMap 3 release 2.

1KGP: SNP markers tagging each haplotype in probands of family 1 and 2 from the 1000 Genomes Project (phase 1 version 3).

MAF: SNP markers with MAF  $\leq$  0.2 in dbSNP 138.

## Supplemental References

1. Skarnes, W. C., Rosen, B., West, A. P., Koutsourakis, M., Bushell, W., Iyer, V., Mujica, A. O., Thomas, M., Harrow, J., Cox, T., et al. (2011). A conditional knockout resource for the genome-wide study of mouse gene function. *Nature* 474, 337-342.
2. Wang, K., Li, M., Hakonarson, H. (2010). ANNOVAR: functional annotation of genetic variants from high-throughput sequencing data. *Nucleic Acids Res.* 38, e164.
3. Yamagata University Genomic Cohort Consortium. (2014). Pleiotropic Effect of Common Variants at ABO Glycosyltransferase Locus in 9q32 on Plasma Levels of Pancreatic Lipase and Angiotensin Converting Enzyme. *PLoS One* 9, e55903.
